# Supplementary material for: Coupled laboratory and field investigations resolve microbial interactions that underpin persistence in hydraulically fractured shales
Source: PubMed Central journal article supplement — Proc Natl Acad Sci U S A. 2018 Jun 25;115(28):E6585–94. doi: 10.1073/pnas.1800155115 (PMC6048472; doi:10.1073/pnas.1800155115), 2018-06-25
Supplement: pnas.1800155115.sapp.pdf [file pnas.1800155115.sapp.pdf]

1  
2  
3  
4  
5  
6  
7  
8  
9  
10  
11  
12  
13  
14  
15  
16  
17  
18  
19  
20  
21  
22  
23  
24  
25  
26  
27  
28  
29  
30  
31  
32  
33  
34  
35

## Supplementary Information for

*In vitro* interactions scaled to *in situ* conditions: microorganisms predict field scale biogeochemistry in hydraulically fractured shale

Mikayla A. Borton<sup>1</sup>, David W. Hoyt<sup>2</sup>, Simon Roux<sup>3</sup>, Rebecca A. Daly<sup>1</sup>, Susan A. Welch<sup>4</sup>, Carrie D. Nicora<sup>2</sup>, Samuel Purvine<sup>2</sup>, Elizabeth K. Eder<sup>2</sup>, Andrea J. Hanson<sup>5</sup>, Julie M. Sheets<sup>4</sup>, David M. Morgan<sup>4</sup>, Shikha Sharma<sup>6</sup>, Timothy R. Carr<sup>6</sup>, David R. Cole<sup>4</sup>, Paula J. Mouser<sup>5</sup>, Mary S. Lipton<sup>2</sup>, Michael J. Wilkins<sup>1,4</sup>, and Kelly C. Wrighton<sup>1\*</sup>

Kelly C. Wrighton  
The Ohio State University  
Department of Microbiology  
484 W. 12th Avenue  
440 Biological Sciences Building  
Columbus, OH 43210  
[kwrighton@gmail.com](mailto:kwrighton@gmail.com)

### **This PDF file includes:**

- Supplementary text
- Figs. S1 to S11
- References for SI reference citations

### **Other supplementary materials for this manuscript include the following:**

- Datasets S1 to S10

## 36 **Supplementary Information Text**

### 37 *Osmoprotection Activity*

38 Hydraulic fracturing creates a unique environment for life in which salinities  
39 increase from freshwater to brine through time. In Utica well 1 sampled, salinities  
40 reached up to 95 g/L chloride (Dataset S1). The pressure of salinity is reflected in the  
41 microcosm microbial community, as the genomes recovered are halotolerant and have  
42 the genomic potential to cope with elevated osmolarity (Figure S5). Further, both  
43 mechanisms for osmoprotection, including the salt-in strategy and production of  
44 compatible solutes, are detected in the metaproteome (1-2) (Figure S5).

45 *Halanaerobium* use the salt-in strategy, specifically utilizing multiple copies of  
46 sodium/proton antiporters (nhaC) that regulate intracellular sodium concentration while  
47 also balancing the number of protons in the cell (1). Contrary to prior reports (1),  
48 *Halanaerobium* in this microcosm also actively import and synthesize known  
49 osmoprotectants (Figure S5). We show that choline, proline, and glutamine are being  
50 actively imported or synthesized by *Halanaerobium* with no mechanism for degradation  
51 (Figure S5). While proline and glutamine could be assimilated by the cell, choline is  
52 imported and neither degradation mechanism (choline lyase or choline  
53 dehydrogenase) is present in the proteome or genome. Furthermore, no published  
54 *Halanaerobium* genomes, isolates or from metagenomics, have the genomic potential  
55 to degrade choline. *Halanaerobium* strains can also import maltose and trehalose via  
56 ABC transporters, but these compounds are actively degraded to D-glucose by maltose  
57 phosphorylase and alpha, alpha-trehalose phosphorylase, respectively. Similarly,  
58 *Halanaerobium* can transport and degrade GB, making it an unlikely osmoprotectant.  
59 It should be noted that taurine and mannitol are likely not being imported into the cell  
60 because these compounds are not detected in the microcosm or in Utica produced  
61 fluids. Likewise, the respective transporters are not substrate specific and are able to  
62 import GB and fructose, respectively (Figure S5).

63 Like *Halanaerobium*, *Ca. Uticabacter*, employs both the salt-in and compatible  
64 solute strategy simultaneously. *Ca. Uticabacter* utilizes sodium/ proton antiporter  
65 (nhaC) and uptakes GB, proline, and glutamine, but does not degrade these  
66 compounds, suggesting that it is using them for osmoprotection (Figure S5). It is also  
67 possible that proline and glutamine are being used in protein synthesis.  
68 *Methanohalophilus* actively imports and synthesizes GB for osmoprotection from  
69 glycine and sarcosine by glycine and sarcosine methyltransferases, respectively  
70 (Figure S5). *Geotoga* uptakes trehalose, maltose, glutamine and GB, with GB and the  
71 sugars being the likely compatible solutes. Maltose and trehalose are being  
72 interconverted via maltose alpha-D-glucosyltransferase by *Geotoga* but the proteins for  
73 degradation are not detected. Notably, the only two osmoprotectants detected in the  
74 produced fluids from the Utica well time series were GB and choline, suggesting that  
75 these two amines are key in microbial salinity tolerance (Dataset S1). Furthermore,  
76 based on GB trends, we infer both utilization (for osmoprotection, energy generation,  
77 and carbon and nitrogen assimilation) and production (for osmoprotection) of GB.

### 78 79 *Viruses*

80 Viruses accounted for 0.9% of the total microcosm metagenomic reads, denoting  
81 their prevalence in this *in vitro* ecosystem. Notably, viral peptides were detected in the

82 metaproteomics data. Our microcosm proteomic data also provided evidence for the  
83 activity of both viral lifestyles. Evidence for virion-producing active infections, as opposed  
84 to a lysogenic state, was provided by detection of multiple peptides for capsid production  
85 (e.g. terminase and head proteins). Also, we have evidence that some viral members are  
86 entering the lysogenic cycle and integrating themselves into host genome, as viral  
87 recombinase and resolvase proteins were also expressed.

88 Using nucleotide frequency (3), we demonstrated that viruses could be associated  
89 with every host. We predicted *Halanaerobium* was the most likely host for 8 viruses,  
90 *Methanohalophilus* for 2 viruses, *Ca. Uticabacter* for 4 viruses, and *Geotoga* for 2 viruses.  
91 Coordinated host and viral abundance patterns over time revealed no significant  
92 differences due to GB amendment, suggesting this treatment had little impact on viral  
93 predation. For three of the four microbial members, the microcosm viruses exhibited the  
94 same dynamics as their hosts over time (Figure S6). Alternatively, for *Methanohalophilus*  
95 and its most abundant associated virus, there was a clear decoupling between host and  
96 virus abundance patterns over time regardless of amendment.

97 To more directly link host and viral population genomes, we performed Clustered  
98 Regularly Interspaced Short Palindromic Repeats (CRISPR) array analysis. Two of our  
99 microbial members had CRISPR arrays, with *Methanohalophilus* encoding 148 spacers  
100 in two CRISPR arrays and *Halanaerobium* encoding 206 spacers in four CRISPR arrays  
101 encoded a CRISPR-Cas system. None of the spacer sequences within the  
102 *Methanohalophilus* arrays matched viral genomes in our microcosms, suggesting that  
103 these spacers likely reflected historical viral encounters. We were able to link 8  
104 *Halanaerobium* spacer sequences to 4 microcosm viral populations. Additionally, 14 of  
105 these *Halanaerobium* spacers also linked to 8 viruses recovered in the well used for this  
106 inoculum, as well as 2 viruses from another previously published well (4).

107 To predict if viral predation was ongoing in microcosms, we examined hosts for  
108 expression of CRISPR-Cas immunity genes. CRISPR-Cas proteins for the three  
109 functional stages of adaptive immunity were detected (adaptation, expression,  
110 interference) (Figure 2). Both *Methanohalophilus* and *Halanaerobium* expressed proteins  
111 for the adaptive stage of immunity (Cas1), suggesting active incorporation of spacers into  
112 the CRISPR loci. Concurrently, both also expressed proteins for the interference stage of  
113 viral immunity. *Halanaerobium* proteins were detected for the first part of the interference  
114 stage (Cas 5), which is implicated in producing cognate RNA that binds to invading DNA  
115 (5). Alternatively, *Methanohalophilus* proteins were detected for both parts of the  
116 interference stage (Cas 5 and Cas3), including cleavage of foreign viral DNA (5). Proteins  
117 for the expression stage (Cas6) were only detected from *Methanohalophilus* (Figure 2).

### 118 119 *Stickland Reaction*

120 The Stickland reaction is characterized by the oxidation of one amino acid coupled  
121 to the reduction of another (6,7). Since the discovery of this metabolism in 1934, several  
122 other non-amino acids have been characterized to take part in this reaction, including  
123 glycine betaine (GB), sarcosine, and ornithine (7-9). Organisms use this metabolism to  
124 generate energy in the form of ATP via substrate level phosphorylation (10). Several  
125 organisms have been described to take part in this reaction, most of them members of  
126 the class Clostridia (9-10). Here we describe an active Stickland reaction in  
127 *Halanaerobium* and *Candidatus Uticabacter*.

128 Both *Halanaerobium* and *Candidatus Uticabacter* in the microcosm experiment  
129 use reductase mechanisms related to the glycine reductase mechanism (9). This family  
130 of reductase systems can reduce glycine, sarcosine, proline, or GB. In each system, there  
131 are generally three proteins: protein A (encoded by *grdA*), protein B (encoded by different  
132 genes based on substrate specificity), and protein C (encoded by *grdCD*) (9). In the  
133 microcosm, *Halanaerobium* use the GB specific protein B (GrdHI), while *Candidatus*  
134 *Uticabacter* use both the sarcosine and glycine specific protein B (GrdFG and GrdBE,  
135 respectively). Methods for determining reductase specificity were reported previously (4).  
136 Briefly, alignments of the GrdE//G/PrdA homolog amino acid sequences from our  
137 metagenomic database and known GrdE//G/PrdA from *Eubacterium acidominophilum*  
138 and *Clostridium sticklandii* revealed that the *Halanaerobium* homolog lacked a conserved  
139 cysteine residue and formed a monophyletic clade with other known GB specific  
140 reductases (Figure S7). Furthermore, two *Candidatus Uticabacter* homologs clustered  
141 with known sarcosine and glycine reductases. Both organisms actively employ these  
142 reductase mechanisms, with all proteins detected in the proteome. For *Halanaerobium*,  
143 a bin likely composed of multiple strains, there are two full mechanisms turned on: *grdA*  
144 (scaffold\_194\_1, scaffold\_93\_1), *grdH* (scaffold\_194\_3, scaffold\_93\_3), *grdI*  
145 (scaffold\_194\_2, scaffold\_93\_2), *grdC* (scaffold\_69\_9, scaffold\_93\_9), and *grdD*  
146 (scaffold\_69\_8, scaffold\_93\_10). *Ca. Uticabacter* used a sarcosine reductase and a  
147 glycine reductase: *grdA* (scaffold\_169\_8, scaffold\_23\_32), *grdB* (glycine specific,  
148 scaffold\_169\_4), *grdE* (glycine specific, scaffold\_169\_3), *grdG* (sarcosine specific,  
149 scaffold\_23\_26), *grdF* (sarcosine specific, scaffold\_23\_27), *grdC* (scaffold\_169\_9,  
150 scaffold\_23\_33), and *grdD* (scaffold\_169\_10, scaffold\_23\_34). For *Candidatus*  
151 *Uticabacter*, all proteins were detected except for GrdA. Given that GrdA was detected in  
152 low amounts relative to the rest of the operon for the highly abundant *Halanaerobium*, we  
153 posit that *Candidatus Uticabacter* is likely using the sarcosine reductase and GrdA is just  
154 below detection. *Candidatus Uticabacter* using multiple reductase mechanisms has been  
155 found previously in other organisms including *C. sticklandii* and *C. difficile* (9). Moreover,  
156 this finding is consistent with the only other published genome from this genus  
157 (*Dethiosulfatibacter aminovorans* DSM 17477) has the genomic potential for three  
158 reductase mechanisms specific to glycine, sarcosine, and glycine betaine (Figure S7).  
159 One possible source of sarcosine is creatine through enzyme creatinase, which is  
160 expressed in *Ca. Uticabacter*.

161 Several reductants can be used to reduce GB, sarcosine and glycine. Here we  
162 show that *Halanaerobium* use lysine, serine, threonine, glycine, methionine, glutamate  
163 and alanine, while *Ca. Uticabacter* uses glutamate, leucine, phenylalanine, glycine and  
164 threonine. The oxidation of one amino acid in the Stickland reaction provides reducing  
165 power for the reduction of another amino acid. The key enzyme in the generation of this  
166 reducing power for each reductant follows: lysine (3,5-diaminohexanoate  
167 dehydrogenase, E.C. 1.4.1.11), serine (serine dehydratase, E.C. 4.3.1.17), threonine  
168 (threonine dehydratase, E.C. 4.3.1.19 and threonine dehydrogenase E.C. 1.1.1.103),  
169 glycine (glycine cleavage system), methionine (methionine gamma-lyase, E.C. 4.4.1.11),  
170 glutamate (glutamate dehydrogenase, E.C. 1.4.1.4), alanine (alanine dehydrogenase,  
171 E.C. 1.4.1.1), and leucine (leucine dehydrogenase, E.C. 1.4.1.9) (10).

172 These reductants could account for about 39% of GB reduced from  $T_0$  to  $T_M$ , with  
173 lysine (17%), serine (7.2%), threonine (3.8%), glycine (4.1%), and methionine (6.7%) of

174 GB reduction (Dataset S4). Although glutamate and alanine are likely reductants in the  
175 Stickland reaction with GB, as the respective dehydrogenases were detected in the  
176 *Halanaerobium* proteome, these were not apparent by metabolite analyses, suggesting  
177 that alanine and glutamate are being synthesized more quickly than *Halanaerobium* is  
178 oxidizing them (Dataset S1).

179 Lysine and GB are the most likely Stickland pair in the microcosm. Lysine is  
180 oxidized to acetate, butyrate and ammonia through crotonyl-CoA, with the key enzyme  
181 for the Stickland reaction being 3,5-diaminohexanoate dehydrogenase [Fonknechten,  
182 2010 #113]. This enzyme is active concomitant with the GB reductase mechanism with  
183 the highest detection at  $T_M$  in the GB microcosm. Metabolites confirm the oxidation of  
184 lysine, as lysine is reduced by 93% overtime and accounts for 17.1% of GB reduction  
185 from  $T_0$  to  $T_M$  (Figure 3). Moreover, butyrate is produced ( $8.13 \pm 0.5$   $\mu\text{moles}$ ) in a nearly 1  
186 to 1 ratio with lysine loss ( $7.8 \pm 0.5$   $\mu\text{moles}$ ) from  $T_0$  to  $T_F$ , congruent with lysine oxidation.

187

### 188 *Glycine Cleavage System*

189 As discussed previously, glycine is used as a Stickland oxidant (*Ca. Uticabacter*),  
190 a Stickland reductant (*Ca.s Uticabacter* and *Halanaerobium*), and also in osmoprotectant  
191 synthesis (*Methanohalophilus*) (Figure 4). This multi-enzyme complex oxidizes glycine to  
192  $\text{CO}_2$  and methylene-THF (11). Although the reaction can be ran in reverse, we  
193 hypothesize that *Halanaerobium* and *Ca. Uticabacter* are oxidizing the metabolite, freeing  
194 electrons to complete the Stickland reaction. Metabolites confirm this finding in the GB  
195 amended microcosm as  $265.7 \pm 6.3$   $\mu\text{moles}$  of glycine is depleted to  $21.1 \pm 1.0$   $\mu\text{moles}$   
196 from  $T_0$  to  $T_F$ . Moreover, we speculate that *Geotoga*, runs the glycine cleavage system  
197 in reverse, producing glycine because metabolites show glycine production from  $T_M$  to  
198  $T_F$  in the no GB microcosm, when *Geotoga* activity is highest (Figure 1).

199

### 200 *Ethanolamine Utilization*

201 *Halanaerobium* employs a mechanism for ethanolamine utilization (Figure 4).  
202 Congruently, ethanolamine was detected in every time point of Utica produced fluids  
203 sampled here (Dataset S1). In the microcosm, *Halanaerobium* converts ethanolamine,  
204 present in the produced fluid inoculum, into acetaldehyde and ammonium by using the  
205 ethanolamine ammonia lyase (EutBC, 4.3.1.7) (Figure 4, Figure S9). Acetaldehyde is  
206 then converted into acetyl-aldehyde by the aldehyde oxidoreductase (EutE) and  
207 subsequently to acetate through acetylphosphate. Alternatively, acetaldehyde can be  
208 converted to ethanol by an alcohol dehydrogenase (EutG), which is often thought to be  
209 used as a detox mechanism (12) (Figure S9). Microcosm metabolites confirm this  
210 metabolism, as ethanolamine is reduced from a concentration of  $165.3 \pm 7.4$   $\mu\text{moles}$  and  
211  $119.0 \pm 27.4$   $\mu\text{moles}$  to below detect in GB and no GB microcosms, respectively (Figure  
212 4). In the both the GB and no GB enrichment, EutE is detected at higher levels than EutG,  
213 suggesting that *Halanaerobium* is using ethanolamine for energy, rather as a  
214 detoxification mechanism.

215 *Halanaerobium*-encoded detected proteins for ethanolamine utilization include:  
216 ethanolamine ammonia lyase large subunit (EutB, scaffold\_31\_26), ethanolamine  
217 ammonia lyase small subunit (EutC, scaffold\_31\_25), acetylaldehyde dehydrogenase  
218 (EutE, scaffold\_31\_22), alcohol dehydrogenase (EutG, scaffold\_31\_10),  
219 microcompartments/ carboxysome structural proteins (scaffold\_31\_14, scaffold\_31\_21,

scaffold\_31\_24), ethanolamine transporter (EutH, scaffold\_31\_13). All proteins detected in *Halanaerobium* proteome for the Eut operon are shown in Figure S9. Ethanolamine ammonia lyase is a vitamin B12 requiring enzyme, thus *Halanaerobium* imports this cofactor via transporters and does not make it *de novo*. We note that ethanolamine transporter protein EutH is detected in low levels and that ethanolamine is likely diffusing across the membrane concurrent with transport (12) (Figure S9).

### Methane and Acetate Mass Balance Calculations

Given the importance of GB to hydraulically fractured shale organisms, both as a substrate and an osmoprotectant, and the presence of GB in the Utica well sampled, we amended produced fluids with GB and tracked microbial activity and metabolites through time (Figure 3). In the microcosm, *Halanaerobium* utilized GB reductase to reduce GB to TMA (*grdHI*), which was most active at  $T_M$  in the GB amended microcosm (Supplementary Information). Analysis of metabolites by NMR support the proteomics data, showing that in the GB amended microcosm  $42.1 \pm 2.4$   $\mu$ moles of GB was reduced to  $37.9 \pm 0.6$   $\mu$ moles of TMA from  $T_0$  to  $T_M$ , a 90% reduction (Figure 3). Similarly, in the no GB microcosm,  $2.6 \pm 0.1$   $\mu$ moles of GB was 81.2% reduced to TMA from  $T_0$  to  $T_M$  (Figure 3).

The TMA produced by *Halanaerobium* is utilized by *Methanohalophilus*, a methylotrophic methanogen (Figure 3). The most methane is produced from  $T_M$  to  $T_F$  in the GB amended microcosm (Figure 3). From  $T_M$  to  $T_F$ , 95% and 60% of TMA is converted to methane in the GB and no GB microcosm, respectively (Figure 3). Congruently, the most *Methanohalophilus* proteins are detected in  $T_F$  timepoints, with the GB amended microcosm having statistically more than the no GB microcosm. Furthermore, the trimethylamine specific pyrrolysine-containing methyltransferase (MttB) and the corresponding corrinoid protein (MttC) were highly detected in  $T_F$  in the GB amended microcosm, statistically more than in any other sample. Methyltransferase proteins specific to dimethylamine, monomethylamine, and methanol and all proteins necessary for methanogenesis were also detected (Dataset S1). Dimethylamine and monomethylamine concentrations followed the same pattern as trimethylamine, increasing from  $T_0$  to  $T_M$  and decreasing in from  $T_M$  to  $T_F$  (Dataset S2). If we assume all methane production was fueled indirectly by GB, 72% of GB accounts for all methane produced in the GB amended microcosm from  $T_0$  to  $T_F$  (Figure 3). There was no potential for GB or choline demethylation in our microcosm experiments, as no non-pyrrolysine trimethylamine methyltransferases were detected (13-14).

Acetate, also produced one to one with TMA in the reduction of GB, had a net increase of  $63.8 \pm 1.5$   $\mu$ moles from  $T_0$  to  $T_M$  in the GB amended microcosm (Figure 4). The excess acetate ( $25.9 \pm 1.5$   $\mu$ moles) produced in the GB amended microcosm can be accounted for by residual carbon fermentation, as the no GB microcosm produced  $24.0 \pm 1.7$   $\mu$ moles acetate, of which only  $2.5 \pm 0.1$   $\mu$ moles came from GB fermentation. Given that acetate is produced in a one to one stoichiometric balance with TMA from GB reduction (9), we know that excess acetate (not accounted for by GB reduction,  $25.9 \pm 1.5$   $\mu$ moles) was produced in the GB amended microcosm. Notably this accounts for ~97% of acetate in non-amended microcosm ( $24.0 \pm 1.7$   $\mu$ moles), where no GB was added. With GB accounting for 46% of acetate production, the excess can be

266 accounted for through sugar fermentation, with glucose (2.3%), trehalose (21.1%),  
267 ethylene glycol (11.1%), ethanolamine (1.4%), pyruvate (0.3%), maltose (2.3%), and  
268 fructose (4.0%) accounting a substantial portion of acetate production in the amended  
269 GB microcosm. See Dataset S1 for detailed acetate mass balance calculations.

270

271 *Back to the field: Validation of microcosm generated hypotheses across wells*

272 We compared our metabolic findings from microcosm experiments to previously  
273 published hydraulically fractured shale datasets and 33 metagenomes paired to  
274 metabolites published here. Prior to the Daly, *et al.* study, HF microbiology studies were  
275 limited to 16S rRNA analyses, did not have time series data including injected fluids, or  
276 did not include metabolites (15-17). Given that Daly *et al.* was a single well, it was  
277 necessary to apply our microcosm findings to other wells in different shale formations.  
278 Here we add 33 metagenomes and paired metabolites to build a HF database of 38  
279 metagenomes. The 33 additional metagenomes came from injected fluids and produced  
280 fluids from four wells in the Marcellus and Utica shales. Two Utica wells were located in  
281 Ohio, two Marcellus wells in West Virginia, and one Marcellus well in Pennsylvania  
282 (Figure S10). Chloride concentrations increased over time in all wells (Figure S10).  
283 Metabolites and metagenome information can be found in Datasets S1 and S2,  
284 respectively.

285 In light of the importance of the Stickland reaction to hydraulically fractured shale  
286 organisms, we mined the published isolate genomes and metagenomes from produced  
287 fluids for the necessary genes (4,18-19). We found that 24% of genomes in our shale  
288 database had the potential to use GB, 5 of them *Halanaerobium*. Moreover, we found that  
289 the most abundant *Halanaerobium* strain at late time points in the well sampled here has  
290 a GrdI (*Halanaerobium* 6-U2, genome previously published in Booker, *et al.* (18). As  
291 previously reported, *Frackibacter*, a new genus within the Halobacteroidaceae discovered  
292 in shale, has the potential to reduce GB (4), and 2 of 3 publicly available *Frackibacter*  
293 genomes have the genomic potential to use GB.

294

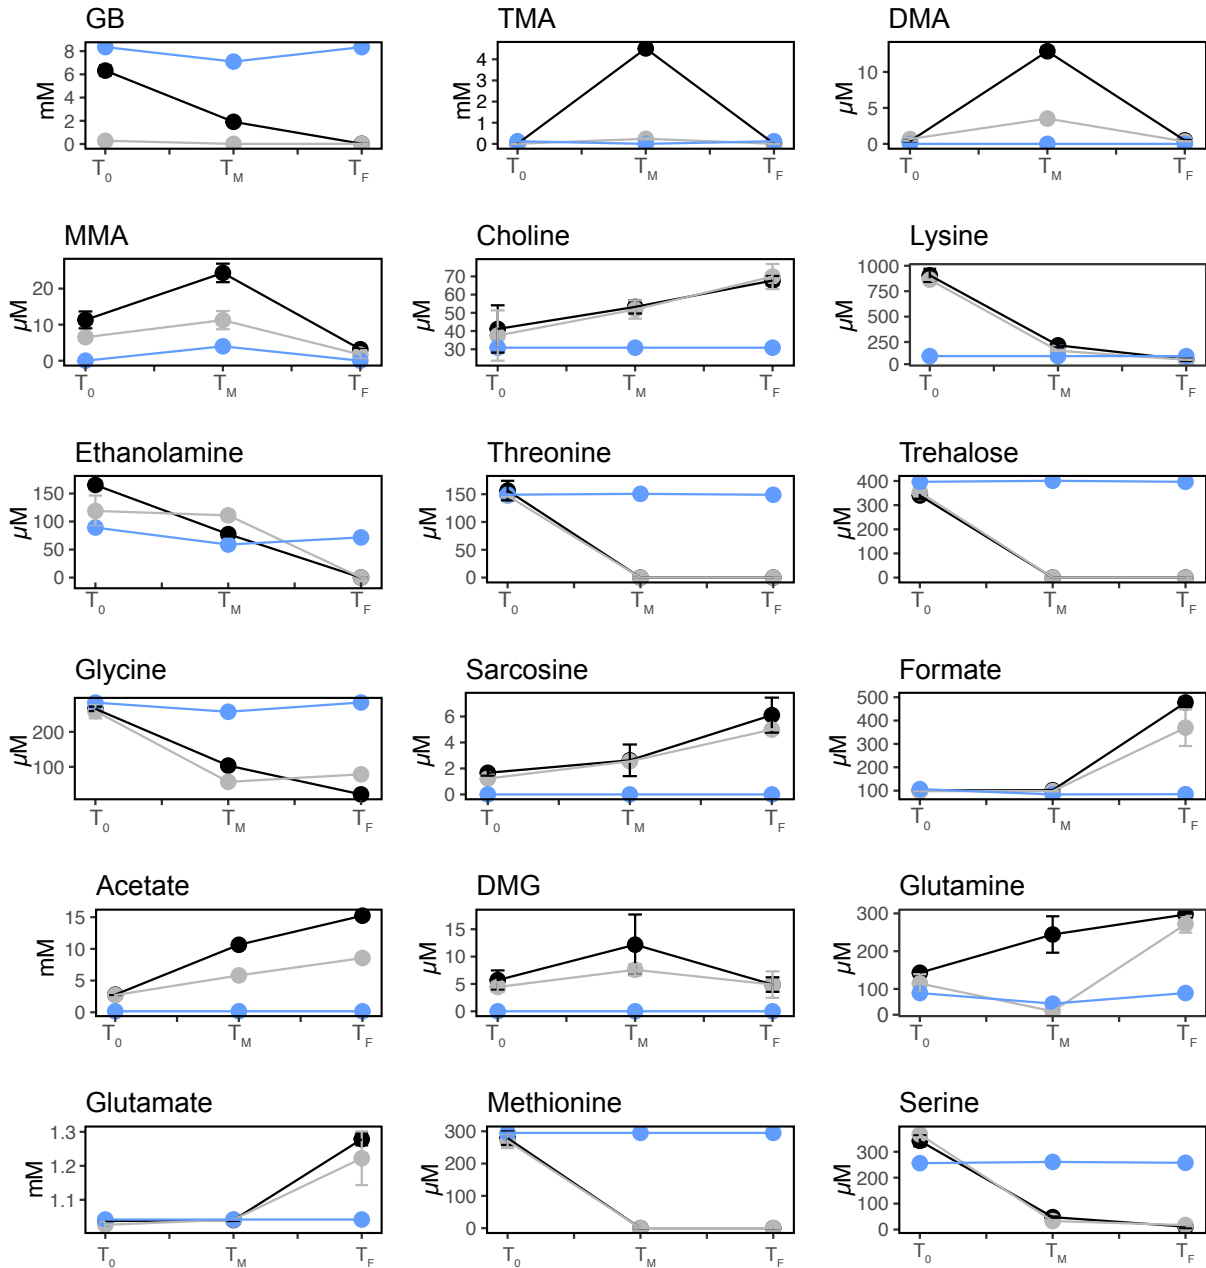

296  
 297 **Fig. S1.** Graphs show all metabolites detected in microcosms by NMR, with all treatments  
 298 shown (with GB= Black, no GB= grey, Media Control= blue). Points indicate triplicate  
 299 average and error bars show one standard deviation from the mean.  
 300  
 301  
 302  
 303  
 304  
 305  
 306



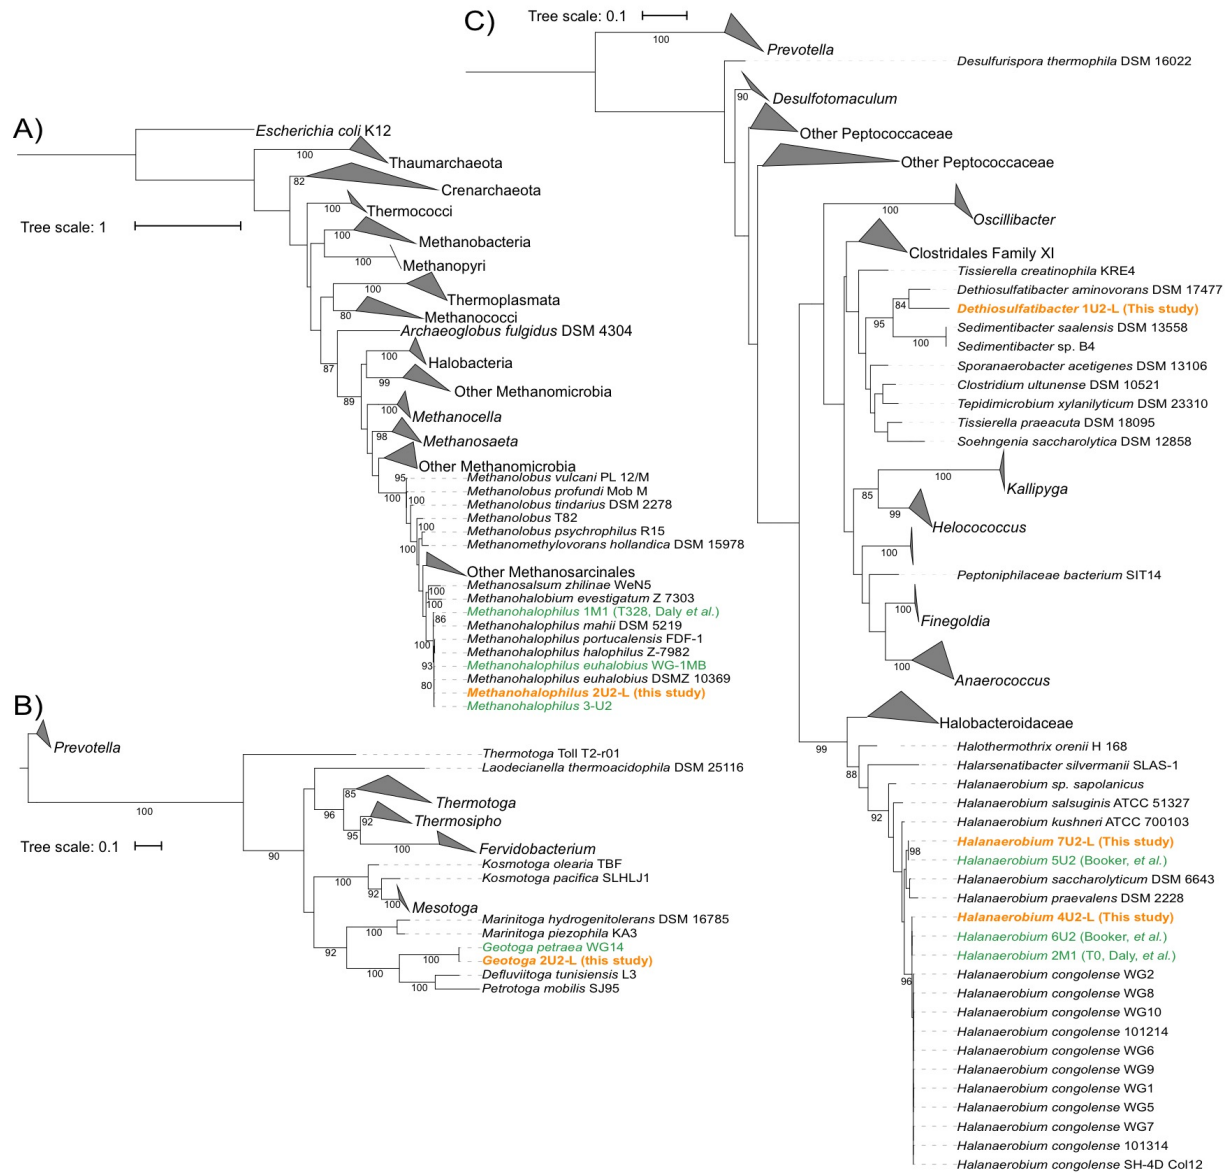

307  
 308 **Fig. S2.** Maximum likelihood S3 ribosomal protein trees of archaea (A) and  
 309 Thermotogaceae (B), and Firmicutes (C), showing the taxonomic assignment of  
 310 genomes from the microcosm experiment. S3 amino acid sequences from bins in this  
 311 study are shown in orange, while sequences from (4) are shown in green.  
 312

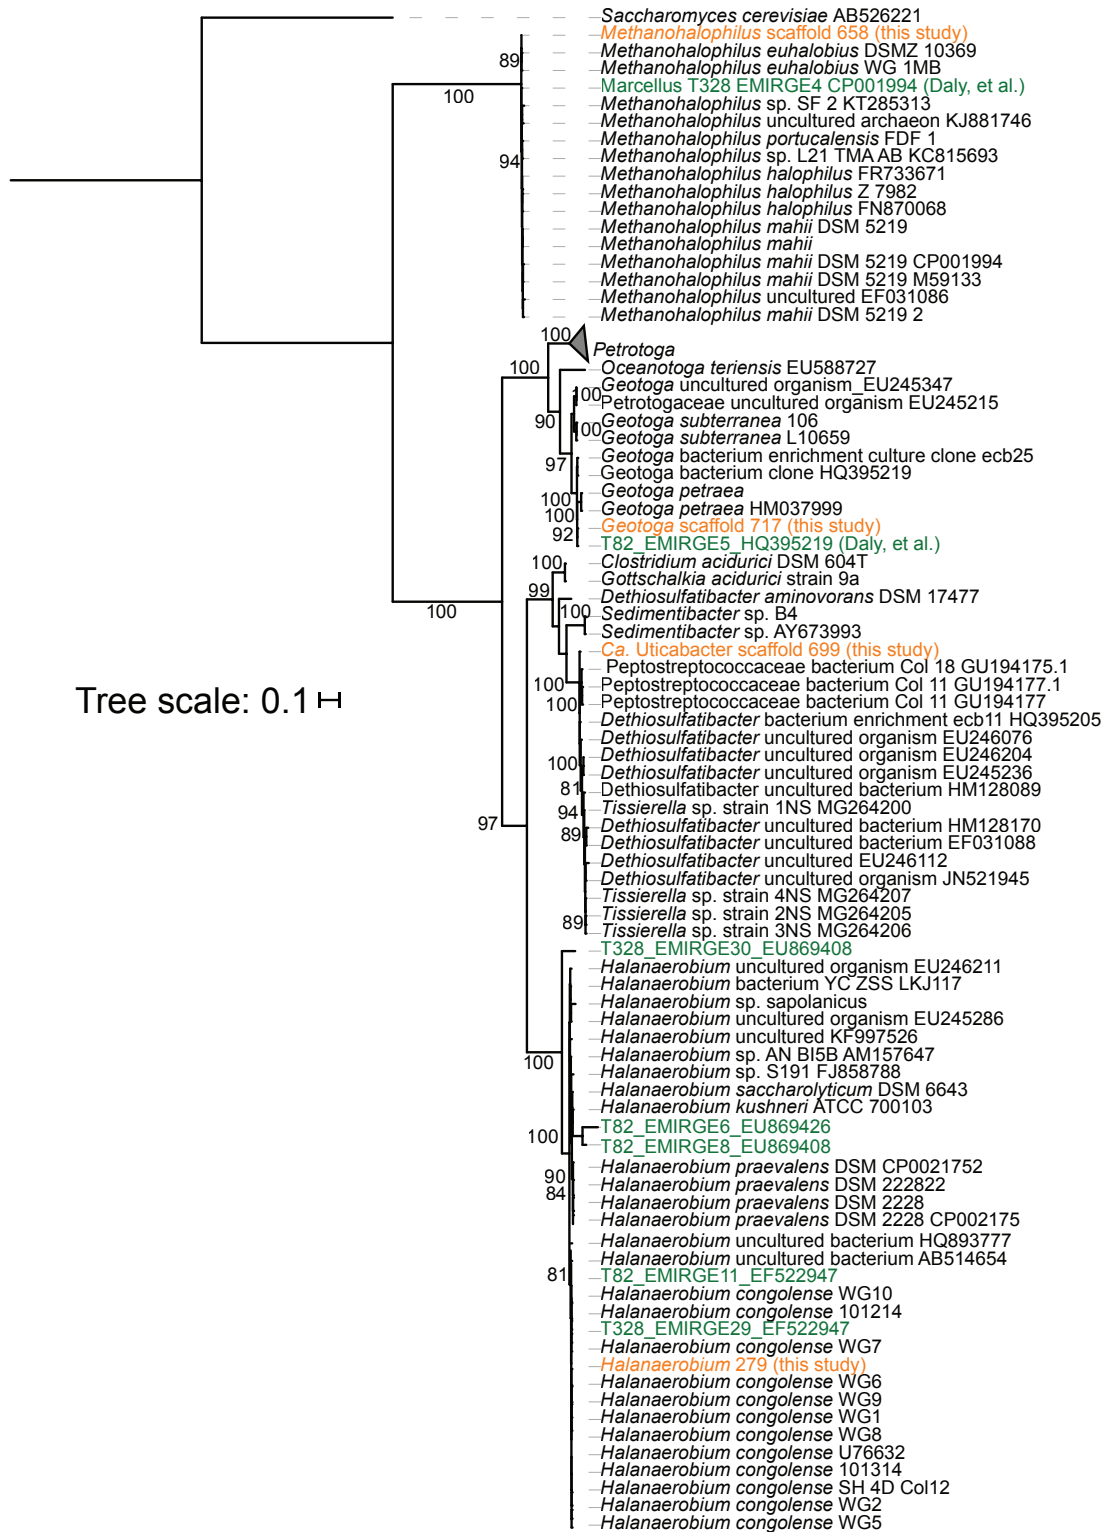

314  
315  
316  
317  
318

**Fig. S3.** Maximum likelihood 16S rRNA tree, showing the taxonomic assignment of genomes from the microcosm experiment. 16S rRNA from bins in this study are shown in orange, while sequences from (4) are shown in green.

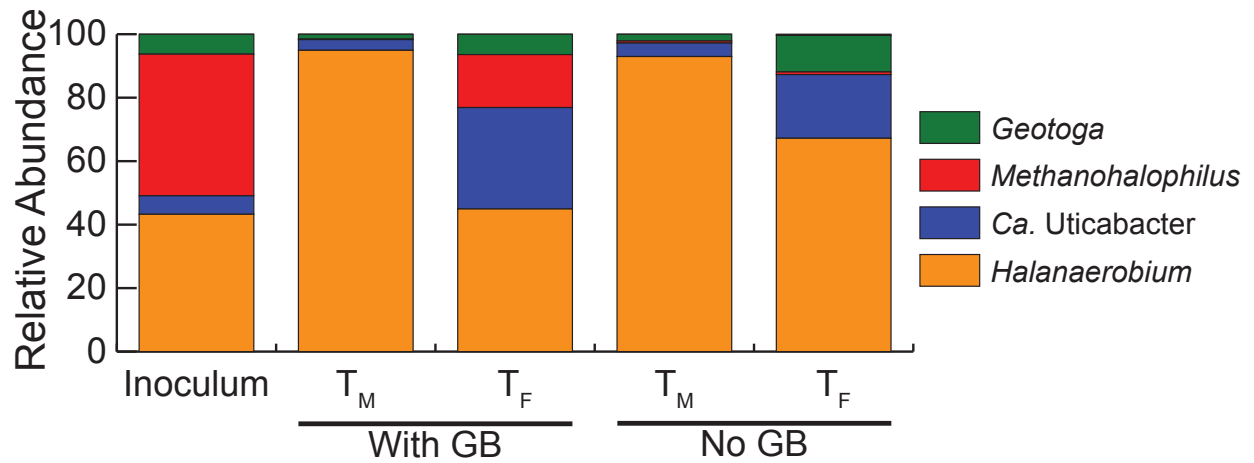

319  
 320  
 321  
 322  
 323  
 324  
 325

**Fig. S4.** Relative abundance by EMIRGE of all time points in the GB and non-GB microcosm experiments. Stacked bars are colored by organism within each metagenome. Organisms with >0.05% relative abundance are shown.

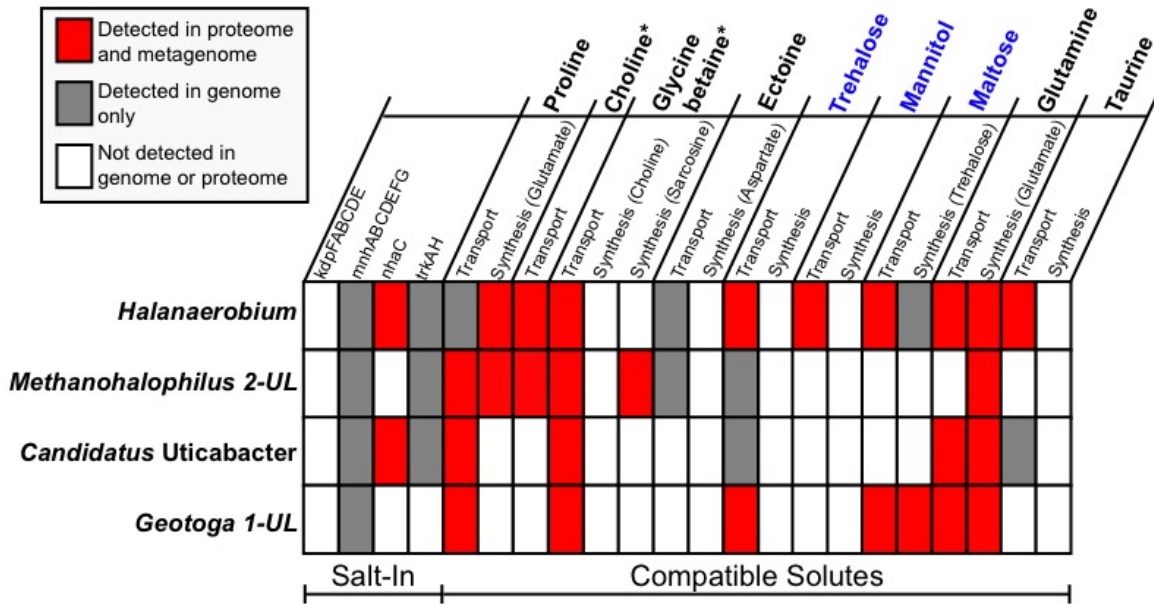

326  
 327 **Fig. S5.** Heatmap denotes active and potential osmoprotection strategies utilized by  
 328 microcosm microbial community. Both salt-in and compatible solute strategies are  
 329 considered. Compatible solute compounds found in the produced fluid Utica well time  
 330 series are denoted with an asterisk (\*), while sugar compatible solutes are shown in  
 331 blue text. For multisubunit enzymes, >75% percent of proteins were required for detected  
 332 in the proteome status.

333  
 334

335  
 336  
 337  
 338  
 339  
 340  
 341  
 342  
 343  
 344  
 345  
 346  
 347  
 348  
 349  
 350  
 351  
 352  
 353  
 354  
 355  
 356  
 357  
 358  
 359  
 360  
 361  
 362  
 363  
 364  
 365  
 366  
 367  
 368  
 369  
 370  
 371  
 372  
 373  
 374  
 375  
 376  
 377  
 378

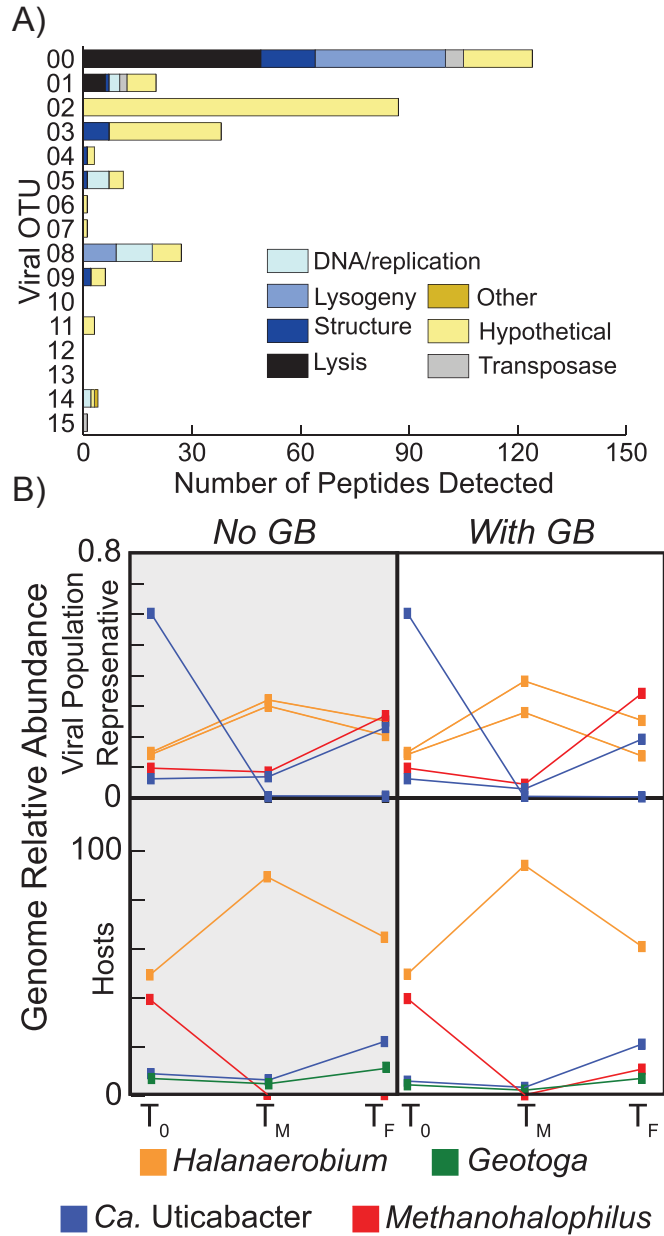

**Fig. S6.** A) Stacked bar chart denotes detected unique viral peptides per representative genome broken into 7 different categories (see methods). B) Genome relative abundance of microbial hosts (bottom) and viral population representatives (top) are shown across time and within treatments (No GB and With GB shown on the left and right, respectively). Only viral populations with >0.1% relative abundance in at least one timepoint in GB microcosm are shown. Viral OTUs represented in B include 00 (*Methanohalophilus*, red), 02 (*Ca. Uticabacter*, blue, decreasing from T<sub>0</sub> to T<sub>F</sub>), 10 (*Halanaerobium*, orange, least abundant), 13 (*Ca. Uticabacter*, blue, increasing from T<sub>0</sub> to T<sub>F</sub>), and 15 (*Halanaerobium*, orange, most abundant).

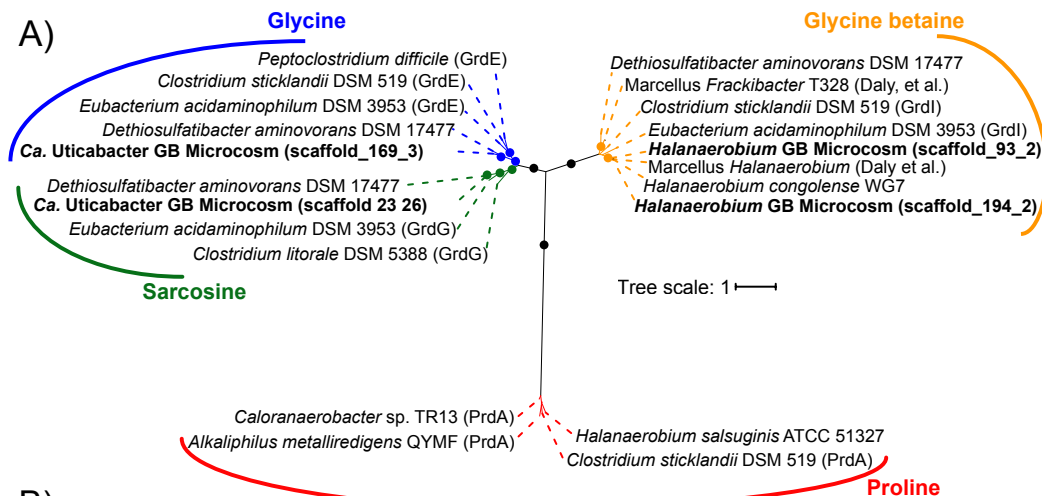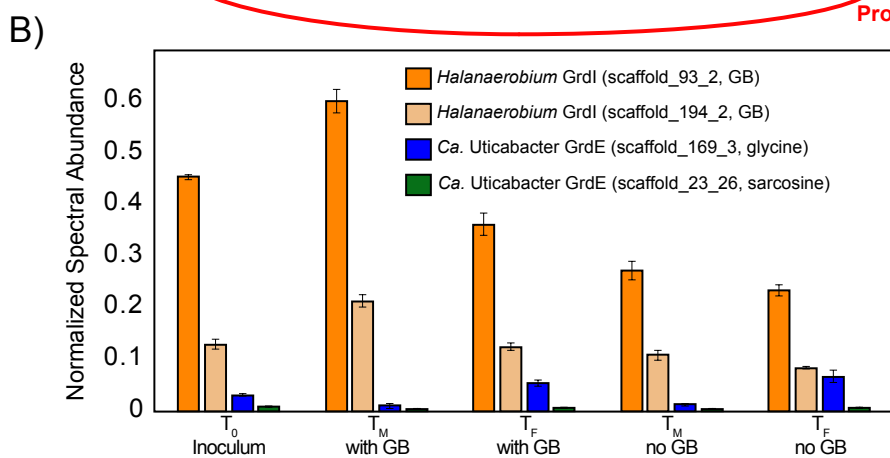

379  
 380  
 381 **Fig. S7.** Reductase systems for glycine, GB, and sarcosine are active in microcosm  
 382 experiments. A) Phylogenetic analyses of GrdE (blue, glycine), GrdG (green, sarcosine),  
 383 GrdI (orange, GB), and PrdA (red, proline) proteins from microcosm experiments showed  
 384 that proteins clustered by substrate specificity. *Halanaerobium* had two active copies of  
 385 GB reductase and *Candidatus Uticabacter* had an active glycine and sarcosine  
 386 reductase, as these formed monophyletic clades with known GB, with known reducers of  
 387 the respective methylamine substrates, *Eubacterium acidaminophilum* and *Clostridium*  
 388 *sticklandii*. Sequences from this study are in bold and include the genome and scaffold  
 389 number followed by the relevant gene number(s). Bootstraps >90 are shown with closed  
 390 circles at nodes. B) Activity shown of the reductases in A) is shown by time point (x-axis)  
 391 with color denoting reductase mechanism. Bars represent average activity of biological  
 392 triplicates with standard deviation shown (error bars).

393  
 394  
 395  
 396  
 397  
 398

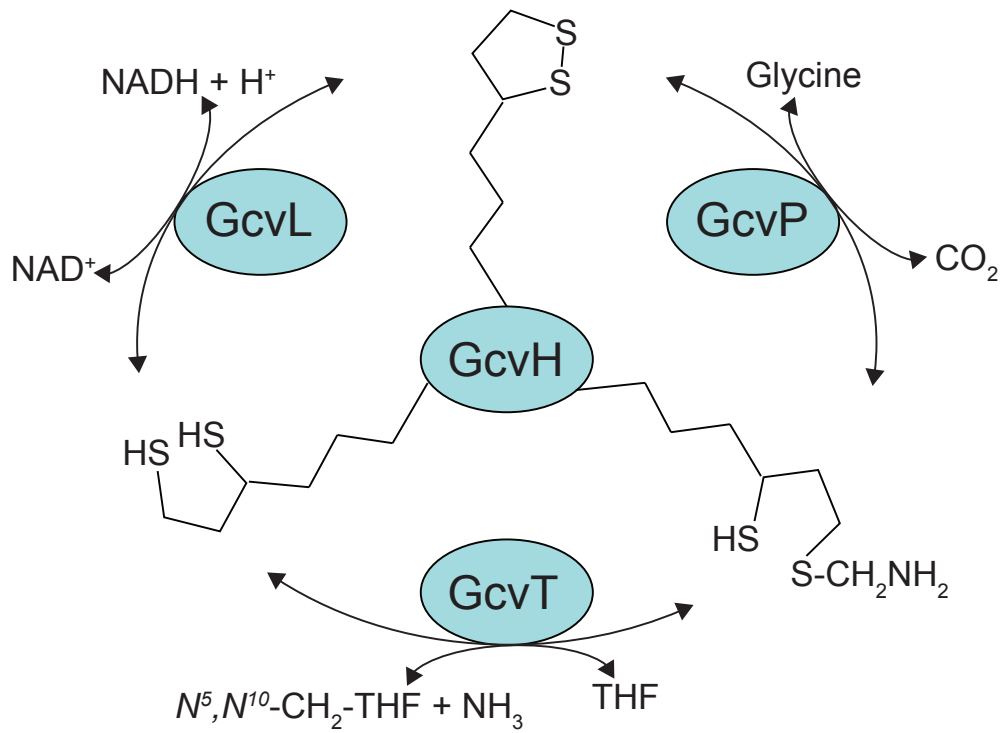

400  
 401  
 402  
 403  
 404  
 405  
 406  
 407  
 408  
 409  
 410  
 411  
 412  
 413  
 414  
 415  
 416  
 417  
 418  
 419  
 420  
 421  
 422  
 423

**Fig. S8.** Glycine cleavage system (Gvc) is shown, with four key proteins denoted in blue ovals.

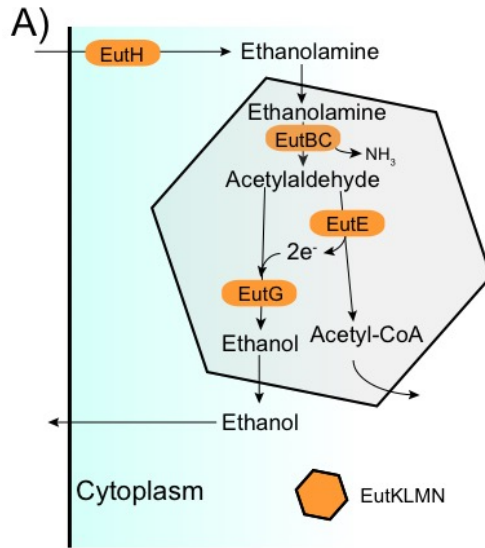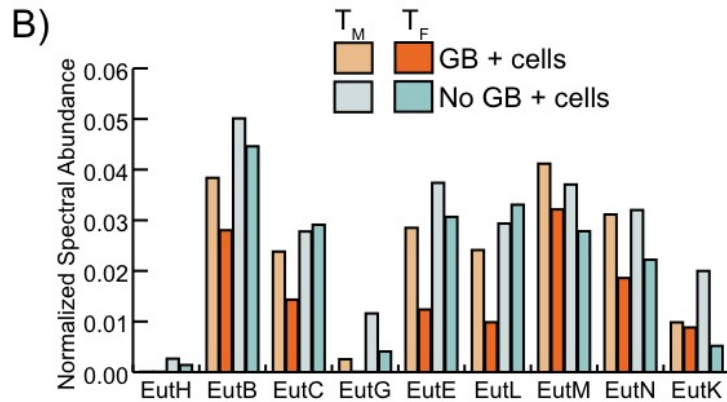

424  
425  
426  
427  
428  
429

**Fig. S9.** Ethanolamine utilization in *Halanaerobium*. A) Pathway of ethanolamine utilization by *Halanaerobium*. All proteins shown were detected in the metaproteomics. B) Relative quantification of ethanolamine utilization proteins. Each bar represents the average NSAF value for each protein (in triplicate) within each time point by treatment.



430  
431  
432  
433  
434  
435  
436  
437  
438  
439  
440  
441  
442  
443  
444  
445  
446  
447  
448  
449  
450  
451  
452  
453  
454  
455  
456  
457  
458  
459  
460  
461  
462  
463  
464  
465  
466  
467  
468  
469  
470  
471  
472  
473  
474  
475

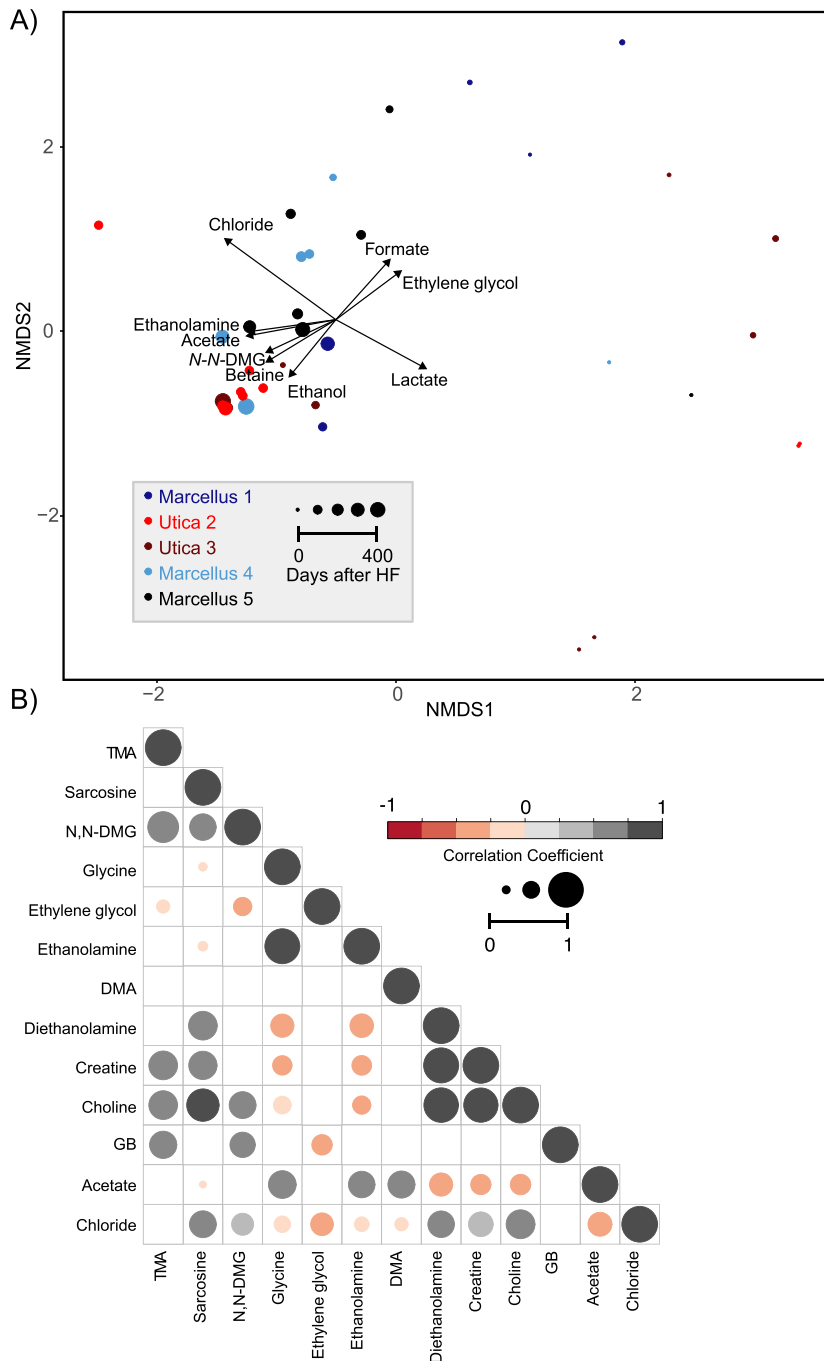

**Fig. S10.** A) Nonmetric multidimensional scaling of microbial community abundance overlaid with geochemistry. All vectors show significant associations between microbial communities and paired sample chemistry (envfit,  $p$ -value $<0.05$ ). Samples are colored by well and bubble size denotes time after HF. B) Bubble plot shows significant correlations between metabolites analyzed by NMR in 26 produced fluid samples collected from five HF wells, inputs were excluded from the analysis for clarity. Bubble color and size denotes correlation coefficients using colored scale bar below.

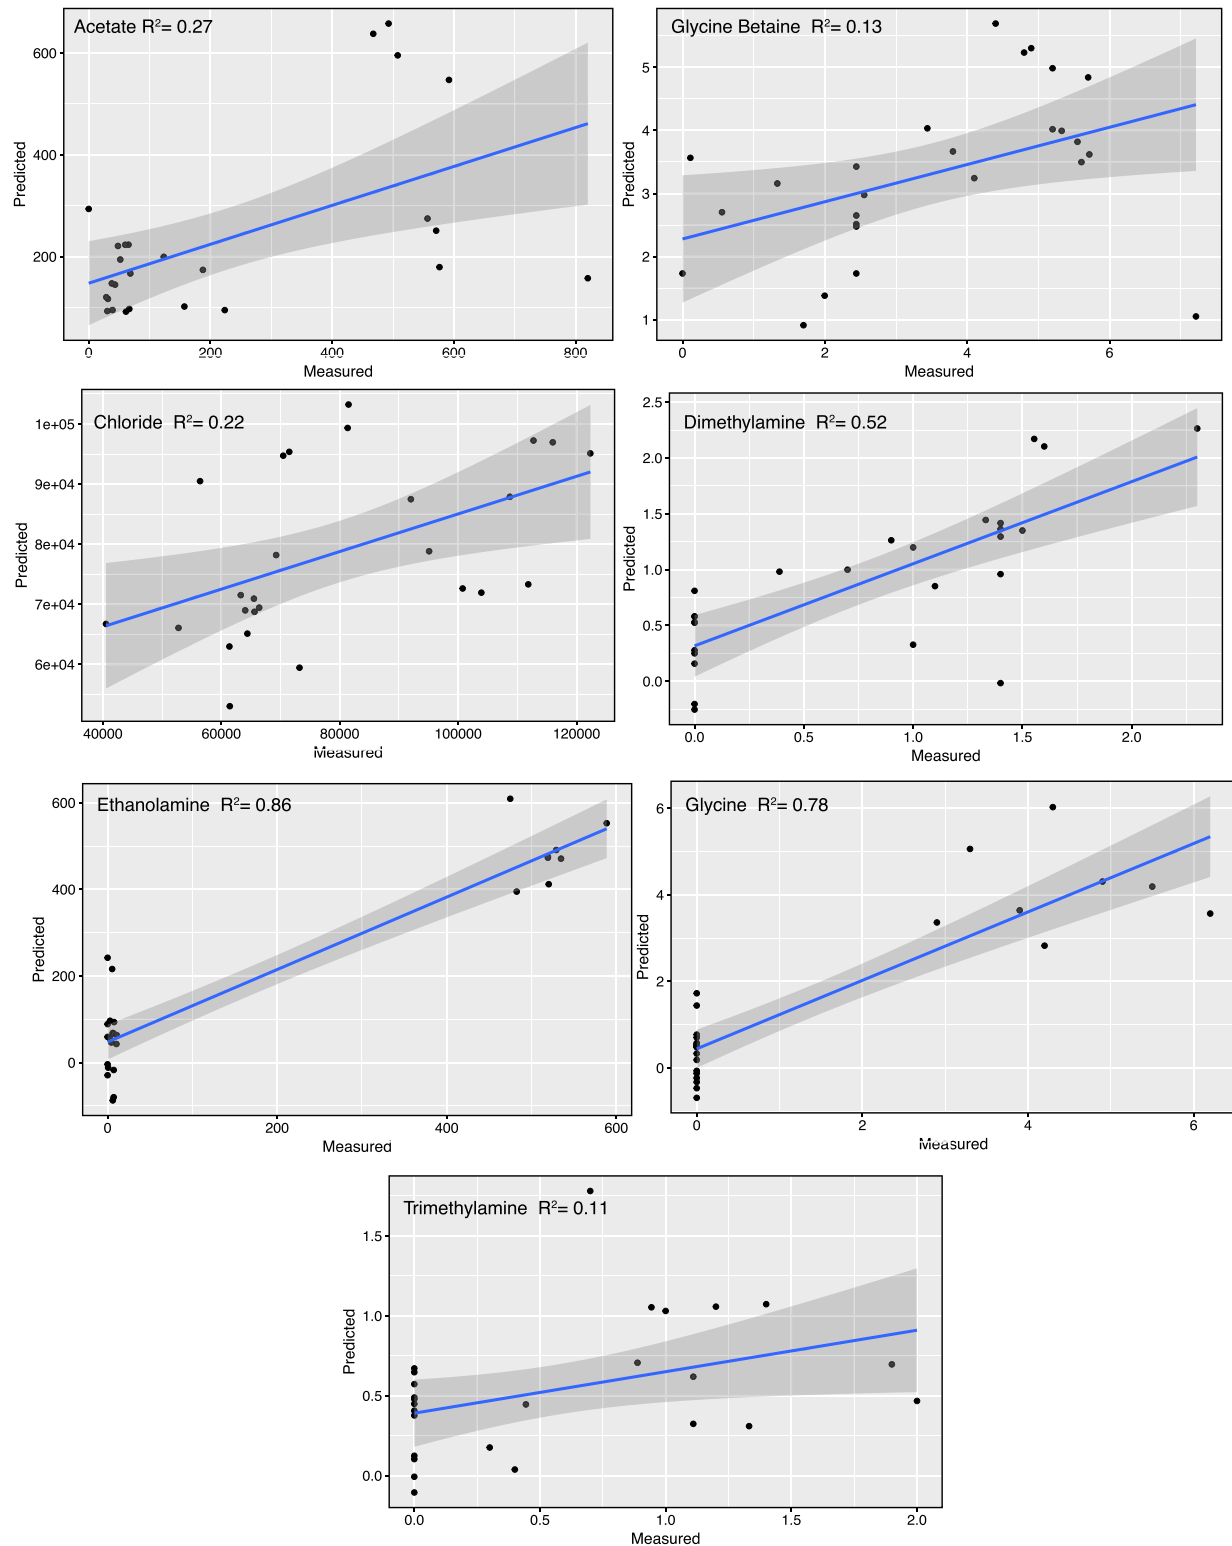

476  
477  
478  
479  
480

**Fig. S11.** Produced fluid microbial communities predict acetate, chloride, dimethylglycine, glycine, trimethylamine, and glycine betaine using sPLS. Correlations of measured versus predicted for each metabolite is shown, all p-values < 0.05.

481 **Supplementary Dataset Legends:**

482

483 **Dataset S1 (Excel):** Table of detected metabolites ( $\mu\text{M}$ ) and chloride ( $\text{mg/L}$ ) from field  
484 time series ( $n=41$ ) collection and microcosm experiments ( $n=21$ ). Concentrations of zero  
485 denote that the metabolite was below detection. Mass balance calculations are also  
486 included here.

487

488 **Dataset S2 (Excel):** Table optical density and gas chromatography measurements  
489 through time in the microcosm experiment.

490

491 **Dataset S3 (Excel):** Metagenomic and genomic data tables contain metagenome  
492 assembly statistics from field and microcosms, microbial and viral genome bin statistics,  
493 and scaffold and gene information for key metabolisms discussed.

494

495 **Dataset S4 (Excel):** File contains raw peptide data from metaproteomics, including the  
496 unique peptides per amino acid sequence (Protein Report tab), the peptides by amino  
497 acid sequence detected per sample (Proteins per sample tab), and the NSAF values  
498 (NSAF tab).

499

500 **Dataset S5 (Excel):** Strain resolved microbial abundances (by ribosomal S3 protein)  
501 across input and produced fluid samples.

502

503 **Dataset S6 (.fasta):** Nucleotide files of genome bins.

504

505 **Dataset S7 (.fasta):** Amino acid files of genome bins.

506

507 **Dataset S8 (pdf):** Maximum likelihood S3 ribosomal protein tree of unique S3 proteins  
508 from all HF metagenomes.

509

510 **Dataset S9 (excel):** Value Importance in Projection for each predicted metabolite in  
511 Figure 5.

512

513 **Dataset S10 (Rscript):** Rscripts used for and sPLS analyses.

514

515 **References:**

516

517 1. Oren A (1999) Bioenergetic aspects of halophilism. *Microbiology and molecular*  
518 *biology reviews* 63(2):334-348.

519 2. Sleator RD & Hill C (2002) Bacterial osmoadaptation: the role of osmolytes in  
520 bacterial stress and virulence. *FEMS microbiology reviews* 26(1):49-71.

521 3. Ahlgren NA, Ren J, Lu YY, Fuhrman JA, & Sun F (2016) Alignment-free  
522 oligonucleotide frequency dissimilarity measure improves prediction of hosts from  
523 metagenomically-derived viral sequences. *Nucleic acids research* 45(1):39-53.

524 4. Daly RA, *et al.* (2016) Microbial metabolisms in a 2.5-km-deep ecosystem created  
525 by hydraulic fracturing in shales. *Nature microbiology* 1:16146.

- 526 5. Makarova KS, *et al.* (2011) Evolution and classification of the CRISPR–Cas  
527 systems. *Nature Reviews Microbiology* 9(6):467-477.
- 528 6. Stickland LH (1934) Studies in the metabolism of the strict anaerobes (genus  
529 *Clostridium*): The chemical reactions by which *Cl. sporogenes* obtains its energy.  
530 *Biochemical Journal* 28(5):1746.
- 531 7. Nisman B (1954) The stickland reaction. *Bacteriological reviews* 18(1):16.
- 532 8. Naumann E, Hippe H, & Gottschalk G (1983) Betaine: new oxidant in the Stickland  
533 reaction and methanogenesis from betaine and L-alanine by a *Clostridium*  
534 *sporogenes*-*Methanosarcina barkeri* coculture. *Applied and environmental*  
535 *microbiology* 45(2):474-483.
- 536 9. Andreesen JR (2004) Glycine reductase mechanism. *Current opinion in chemical*  
537 *biology* 8(5):454-461.
- 538 10. Fonknechten N, *et al.* (2010) *Clostridium sticklandii*, a specialist in amino acid  
539 degradation: revisiting its metabolism through its genome sequence. *Bmc*  
540 *Genomics* 11(1):555.
- 541 11. Andreesen JR (1994) Glycine metabolism in anaerobes. *Antonie Van*  
542 *Leeuwenhoek* 66(1-3):223-237.
- 543 12. Garsin DA (2010) Ethanolamine utilization in bacterial pathogens: roles and  
544 regulation. *Nature Reviews Microbiology* 8(4):290-295.
- 545 13. Ticak T, Kountz DJ, Girosky KE, Krzycki JA, & Ferguson DJ (2014) A  
546 nonpyrrolysine member of the widely distributed trimethylamine methyltransferase  
547 family is a glycine betaine methyltransferase. *Proceedings of the National*  
548 *Academy of Sciences* 111(43):E4668-E4676.
- 549 14. Watkins AJ, Roussel EG, Webster G, Parkes RJ, & Sass H (2012) Choline and N,  
550 N-dimethylethanolamine as direct substrates for methanogens. *Applied and*  
551 *environmental microbiology* 78(23):8298-8303.
- 552 15. Mouser PJ, Borton M, Darrah TH, Hartsock A, & Wrighton KC (2016) Hydraulic  
553 fracturing offers view of microbial life in the deep terrestrial subsurface. *FEMS*  
554 *microbiology ecology* 92(11).
- 555 16. Cluff MA, Hartsock A, MacRae JD, Carter K, & Mouser PJ (2014) Temporal  
556 changes in microbial ecology and geochemistry in produced water from  
557 hydraulically fractured Marcellus Shale gas wells. *Environmental science &*  
558 *technology* 48(11):6508-6517.
- 559 17. Akob DM, Cozzarelli IM, Dunlap DS, Rowan EL, & Lorah MM (2015) Organic and  
560 inorganic composition and microbiology of produced waters from Pennsylvania  
561 shale gas wells. *Applied Geochemistry* 60:116-125.
- 562 18. Booker AE, *et al.* (2017) Sulfide Generation by Dominant Halanaerobium  
563 Microorganisms in Hydraulically Fractured Shales. *mSphere* 2(4):e00257-00217.
- 564 19. Lipus D, Vikram A, Ross DE, & Bibby K (2016) Draft genome sequence of  
565 *Methanohalophilus mahii* strain DAL1 reconstructed from a hydraulic fracturing-  
566 produced water metagenome. *Genome announcements* 4(5):e00899-00816.
- 567  
568
