# Supplementary figures and images for: Coupled laboratory and field investigations resolve microbial interactions that underpin persistence in hydraulically fractured shales
Source: PubMed Central journal article supplement — Proc Natl Acad Sci U S A. 2018 Jun 25;115(28):E6585–94. doi: 10.1073/pnas.1800155115 (PMC6048472; doi:10.1073/pnas.1800155115), 2018-06-25

Tree scale: 10

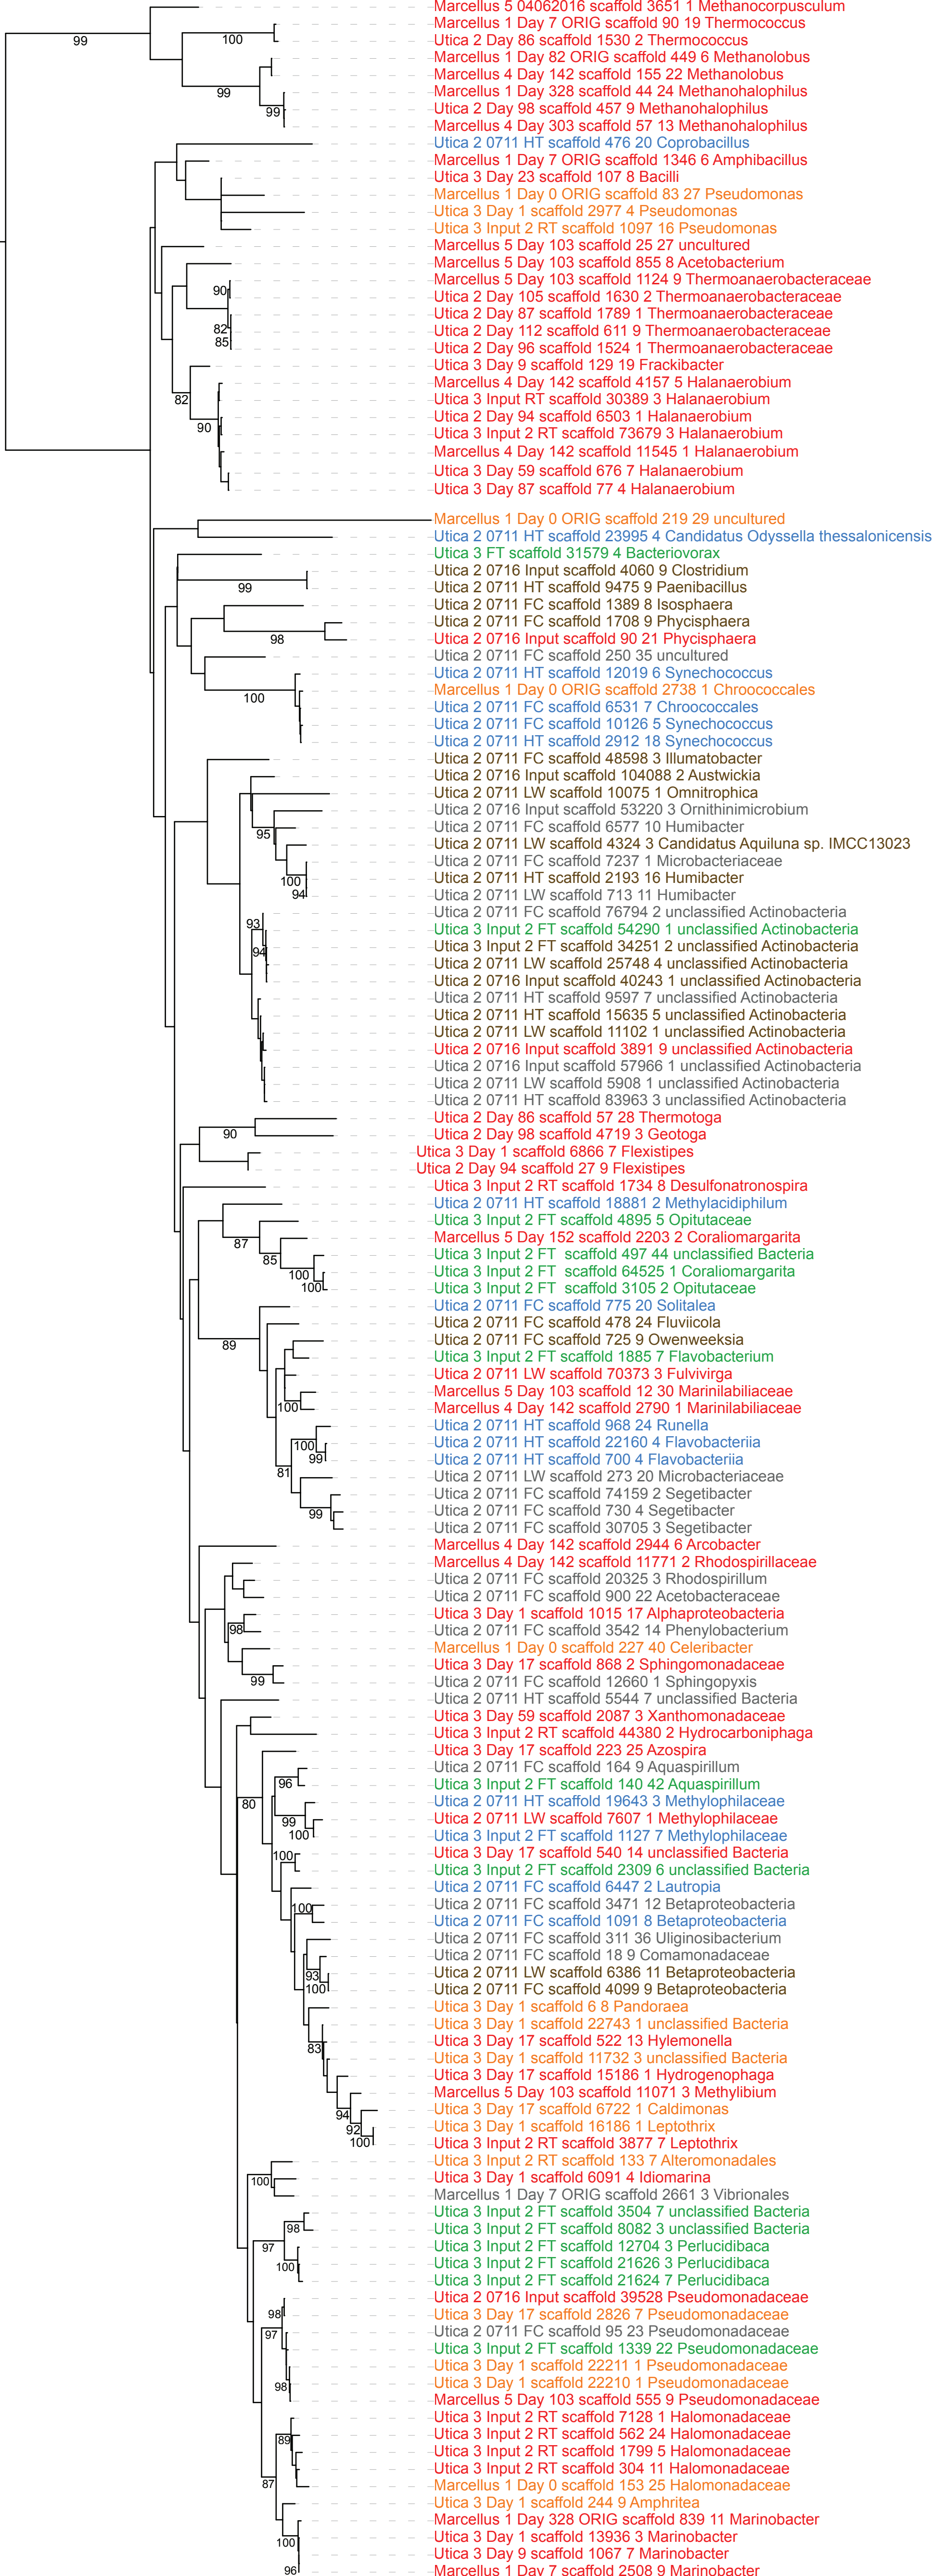

Supplement: pnas.1800155115.sd08.pdf [file pnas.1800155115.sd08.pdf]
